# Supplementary material
Source: Springer Nature journal article supplement (https://www.springermedizin.de/resource/supplementary/13058_2011_2734_MOESM1_ESM.pdf/9702452)
Supplement: MOESM1 [file 9702452]

TRIB3 mRNA levels <33% ..... 33-66% - - - - - >66% ———

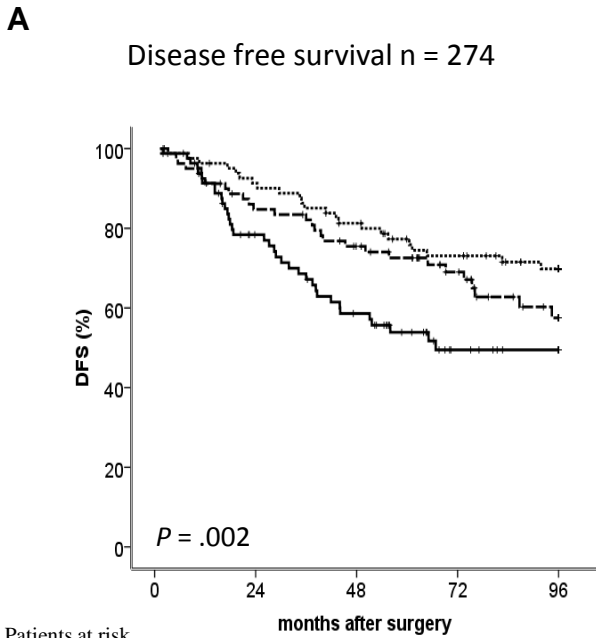

| Patients at risk | 0  | 24 | 48 | 72 | 96 |
|------------------|----|----|----|----|----|
| TRIB3 <33%       | 82 | 73 | 63 | 52 | 41 |
| TRIB3 33-66%     | 82 | 65 | 54 | 37 | 21 |
| TRIB3 >66%       | 83 | 56 | 40 | 18 | 13 |

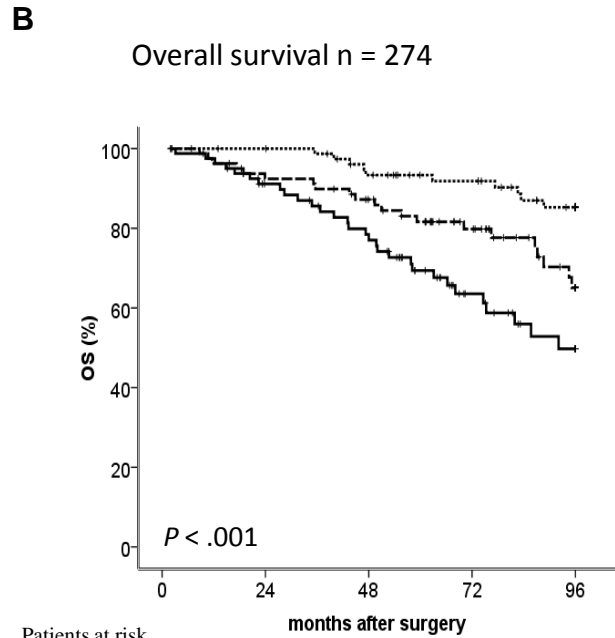

| Patients at risk | 0  | 24 | 48 | 72 | 96 |
|------------------|----|----|----|----|----|
| TRIB3 <33%       | 82 | 79 | 69 | 61 | 49 |
| TRIB3 33-66%     | 82 | 72 | 64 | 44 | 25 |
| TRIB3 >66%       | 83 | 67 | 55 | 28 | 17 |

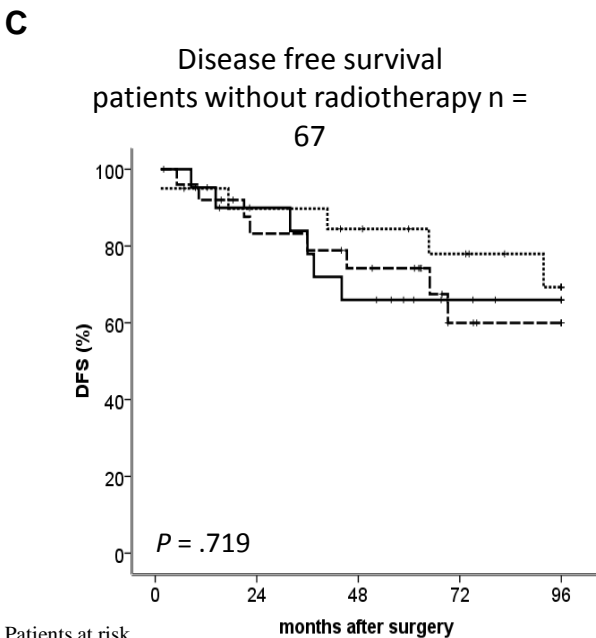

| Patients at risk | 0  | 24 | 48 | 72 | 96 |
|------------------|----|----|----|----|----|
| TRIB3 <33%       | 20 | 17 | 15 | 12 | 8  |
| TRIB3 33-66%     | 25 | 19 | 16 | 7  | 5  |
| TRIB3 >66%       | 22 | 15 | 11 | 5  | 3  |

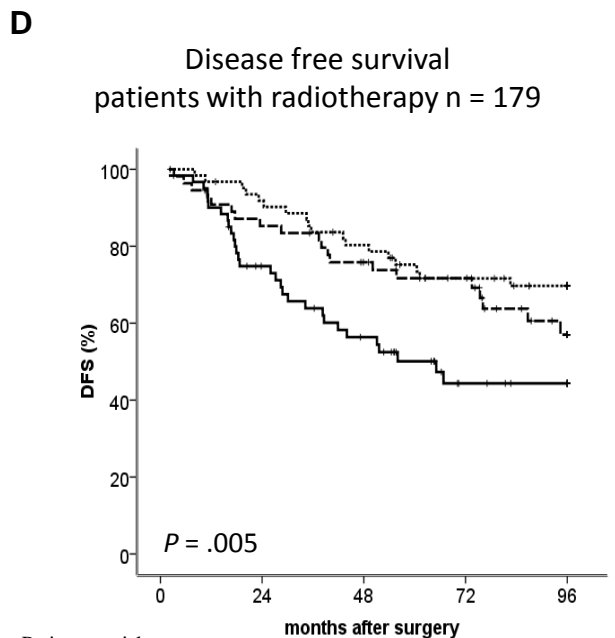

| Patients at risk | 0  | 24 | 48 | 72 | 96 |
|------------------|----|----|----|----|----|
| TRIB3 <33%       | 62 | 56 | 48 | 40 | 33 |
| TRIB3 33-66%     | 56 | 46 | 38 | 30 | 16 |
| TRIB3 >66%       | 61 | 41 | 29 | 13 | 10 |
